# Supplementary material
Source: MDPI journal article supplement (https://www.mdpi.com/2073-4395/11/2/376)
Supplement: s1 [file s1]

**Supplementary material:** Methodology followed for the bibliometric and bibliographic analyses

The following table shows the search query terms and filtering fields used to perform the bibliographic database-based analyses for the three term categories considered in the review.

| <b>CATEGORY</b>   | <b>Term used in<br/>Tables and Figures</b> | <b>Search query term</b>                      | <b>Search<br/>field <sup>a</sup></b> |
|-------------------|--------------------------------------------|-----------------------------------------------|--------------------------------------|
| CROP              | rice                                       | rice OR oryza                                 | title                                |
|                   | wheat                                      | wheat OR triticum                             | title                                |
|                   | maize                                      | maize OR zea OR corn                          | title                                |
| TOOL/<br>APPROACH | QTL mapping                                | qtl OR "quantitative trait loc*"              | topic                                |
|                   | GWAS                                       | "Genome-wide associat*" OR GWAS               | topic                                |
|                   | Genome selection                           | "Genom* selection" OR "Genom* predict*"       | topic                                |
|                   | Gene expression <sup>b</sup>               | "gene Express*" OR transcriptom*              | topic                                |
|                   | Transcriptomics                            | transcriptom* OR "cDNA array"                 | topic                                |
|                   | Quantitative PCR                           | qPCR OR "quantitative PCR" OR "real time PCR" | topic                                |
|                   | RNA-seq                                    | RNA-seq OR "NGS-based RNA sequencing"         | topic                                |
|                   | Transgenesis                               | Transgen*                                     | topic                                |
|                   | Gene editing                               | "Gene* editi*" OR TALENS or CRISPR            | topic                                |
|                   | Mutagenesis                                | mutagenesis                                   | topic                                |
| BREEDING<br>TOPIC | (Any)                                      |                                               | topic                                |
|                   | Drought tolerance, WUE                     | "water use" or "WUE" or "Drought toleran*"    | topic                                |
|                   | Heat tolerance                             | thermotoleran* or "heat toleran*"             | topic                                |
|                   | NUE                                        | "Nitrogen use" or "N use" or NUE              | topic                                |

<sup>a</sup> : The field named as 'topic' in the WOS database searches title, abstract, author keywords, and more. The equivalent field in the SCOPUS database is 'Article title, Abstract, Keywords'.

<sup>b</sup> : Only used in the bibliographic search on the first documented evidence of gene expression analysis (Table 2)

**BIBLIOMETRIC ANALYSIS** Based on searches in the WOS database

**Figures 2, 4 and 6:** Based on the number of records retrieved by combining search queries for [CROP] AND [TOOL/APPROACH].

**Figures 3, 5 and 7:** Based on the number of records retrieved by combining search queries for [CROP] AND [TOOL/APPROACH] AND [BREEDING TOPIC].

**BIBLIOGRAPHIC ANALYSIS** Based on searches in the WOS and SCOPUS databases

**Tables 1 to 3:** The records retrieved by each of the searches used for bibliometric analysis were sorted oldest first. Following in parallel the two chronological lists (in WOS and SCOPUS), the records were being manually revised by the authors until a document evidencing that the corresponding tool/approach was really used, and not merely mentioned, was found. For that purpose, the abstracts were accessed and checked, except when the title was descriptive enough to dispel any doubts. If the abstract was not helpful, the full document was downloaded to check the Materials and Methods section.
